# Supplementary material for: LncRNA and mRNA profiles of human milk-derived exosomes and their possible roles in protecting against necrotizing enterocolitis
Source: Royal Society of Chemistry journal article supplement (doi:10.1039/d2fo01866g), 2022-01-01
Supplement: d2fo01866g2.pdf [file d2fo01866g2.pdf]

| Group     | Mother | Age | Gestational age<br>(week) | Birth weight<br>(g) | Delivery way      |
|-----------|--------|-----|---------------------------|---------------------|-------------------|
| Term-1    | 1      | 34  | 38+1                      | 3110                | Natural birth     |
|           | 2      | 31  | 38+5                      | 3440                | Natural birth     |
|           | 3      | 28  | 39+3                      | 3660                | Natural birth     |
| Term-2    | 4      | 27  | 39+6                      | 3170                | Natural birth     |
|           | 5      | 36  | 38+6                      | 3010                | Natural birth     |
|           | 6      | 30  | 40+3                      | 3340                | Natural birth     |
| Term-3    | 7      | 31  | 38+6                      | 3950                | Caesarean section |
|           | 8      | 32  | 39+5                      | 3350                | Natural birth     |
|           | 9      | 25  | 39+3                      | 3790                | Natural birth     |
| Preterm-1 | 10     | 39  | 32+5                      | 1810                | Natural birth     |
|           | 11     | 26  | 34+4                      | 2780                | Caesarean section |
|           | 12     | 24  | 34+4                      | 2500                | Natural birth     |
| Preterm-2 | 13     | 22  | 34+5                      | 2200                | Caesarean section |
|           | 14     | 27  | 35+4                      | 2470                | Natural birth     |
|           | 15     | 29  | 32+6                      | 2170                | Natural birth     |
| Preterm-3 | 16     | 29  | 35+6                      | 2620                | Caesarean section |
|           | 17     | 28  | 33                        | 2200                | Natural birth     |
|           | 18     | 32  | 34+3                      | 2200                | Caesarean section |

**Supplementary Table 1.** The characteristics of human milk samples.
