# Supplementary figures and images for: LncRNA and mRNA profiles of human milk-derived exosomes and their possible roles in protecting against necrotizing enterocolitis
Source: Royal Society of Chemistry journal article supplement (doi:10.1039/d2fo01866g), 2022-01-01

### CANX

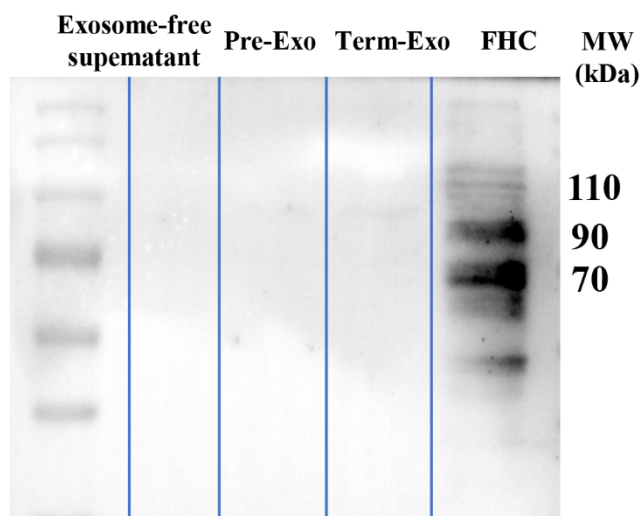

### CD9

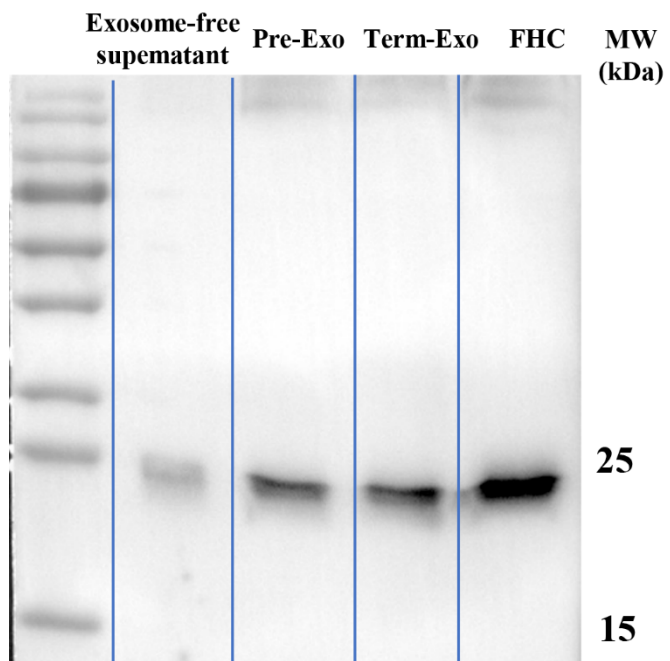

# CD63

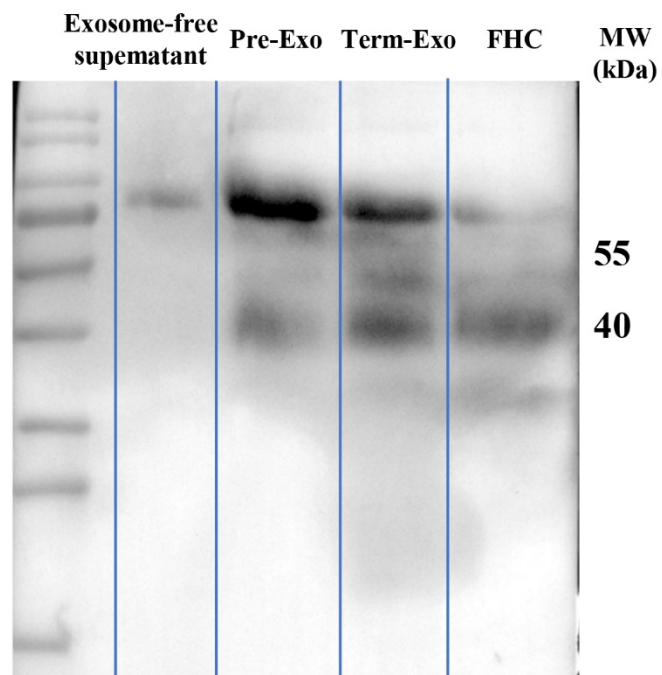

Supplementary Figure 1. The raw images of Western blot.

Supplement: d2fo01866g1.pdf [file d2fo01866g1.pdf]
